# Supplementary material
Source: PubMed Central journal article supplement (PMC10234597)
Supplement: NIHMS1885644-supplement-Supplement_Figure_1.pdf [file NIHMS1885644-supplement-Supplement_Figure_1.pdf]

Supplement Figure 1. Consort diagram

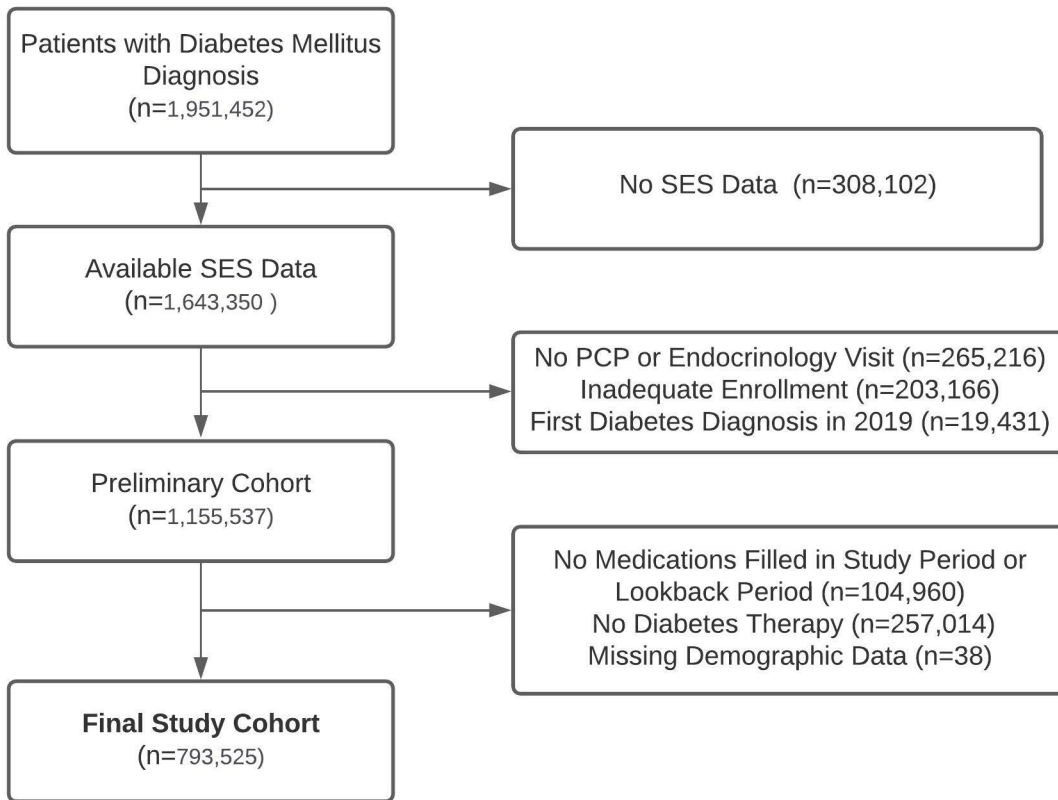

Abbreviations: PCP: primary care provider; SES: Socioeconomic data (educational attainment, income).
